# Supplementary material
Source: PubMed Central journal article supplement (PMC3831436)
Supplement: 1307336110_pnas.201307336SI.pdf [file 1307336110_pnas.201307336SI.pdf]

# Supporting Information

Fouda et al. 10.1073/pnas.1307336110

|                         | chronic clade B |                | clade B T/F    |                |                 | chronic clade C |                    | clade C infant T/F |                 |                 | clade C T/F     | chronic clade AE | nonhuman retroviruses |            |
|-------------------------|-----------------|----------------|----------------|----------------|-----------------|-----------------|--------------------|--------------------|-----------------|-----------------|-----------------|------------------|-----------------------|------------|
|                         | MN tier 1A X4   | YU2 tier 1B R5 | CH40 tier 2 R5 | CH77 tier 2 R5 | CH058 tier 2 R5 | MW965 tier 1 R5 | DU156.12 tier 2 R5 | BF1677 tier 2 R5   | BF329 tier 2 R5 | BF942 tier 2 R5 | 1086C tier 2 R5 | CM235 tier 2 R5  | SVA.MLV               | SIV mac251 |
| <b>HIV- milk</b>        |                 |                |                |                |                 |                 |                    |                    |                 |                 |                 |                  |                       |            |
| 1*                      | <3              | 3              | <3             | 10             | 3               | 7               | 4                  | 5                  | 5               | 7               |                 | 3                | <3                    | 3          |
| 2                       | <3              | 3              | 15             | 26             | 9               | 9               | 5                  | 8                  | 8               | 9               |                 | 8                | <3                    | 10         |
| 3                       | 3               | 3              | 25             | 27             | 14              | 10              | 8                  | <3                 | 3               | 4               |                 | 6                | <3                    | 8          |
| 4                       | <3              | 5              | 17             | 30             | 13              | 12              | 27                 | 3                  | 3               | 4               |                 | 4                | <3                    | 6          |
| 5                       | <3              | <3             | 9              | 15             | 12              | 7               | 9                  | 4                  | 4               | 5               |                 | 2                | <3                    | <3         |
| 6                       | <3              | <3             | 6              | 5              | 5               | 6               | 9                  | <3                 | <3              | <3              |                 | <3               | <3                    | <3         |
| 7                       | <3              | 3              | <3             | 10             | 9               | 3               | 8                  | <3                 | 3               | <3              |                 | <3               | <3                    | <3         |
| 8                       | <3              | 3              | 5              | 15             | 5               | 3               | 3                  | <3                 | 3               | <3              |                 | <3               | <3                    | <3         |
| 9                       | <3              | <3             | 6              | 9              | 5               | 7               | 24                 | <3                 | 5               | <3              |                 | 3                | 3                     | <3         |
| 10                      |                 |                | 5              | 15             | 6               | 3               | 20                 | 3                  | 3               | <3              |                 | <3               | 8                     | <3         |
| <b>Purified protein</b> |                 |                |                |                |                 |                 |                    |                    |                 |                 |                 |                  |                       |            |
| TNC <sup>†</sup>        | 130             | 158            | 122            | 118            | 116             | 120             | 110                | 108                | 110             | 100             | 82              | 113              | 109                   | >180       |
| lactoferrin             | >300            |                | >300           | >300           | >300            | >300            | >300               | >300               | >300            | >300            |                 |                  | >300                  |            |
| Mucin-1                 | >300            |                | >300           |                | >300            | >300            | >300               | >300               | >300            |                 |                 |                  | >300                  |            |

\* = numbers indicate inhibitory dilution 50% (ID<sub>50</sub>)  
<sup>†</sup> = inhibitory concentration 50% (IC<sub>50</sub>, µg/ml)

  ID<sub>50</sub> 3-5 or IC<sub>50</sub> 150-180  
  ID<sub>50</sub> 5-10 or IC<sub>50</sub> 110-150  
  ID<sub>50</sub> >10 or IC<sub>50</sub> <110  
  Not done

**Fig. S1.** Broad-spectrum HIV-1-neutralizing activity of breast milk of uninfected women and purified milk proteins. Neutralization activity of breast milk of uninfected women and breast milk proteins TNC, lactoferrin, and mucin-1 in the TZM-bl reporter cell assay, reported as ID<sub>50</sub> or IC<sub>50</sub>, respectively.

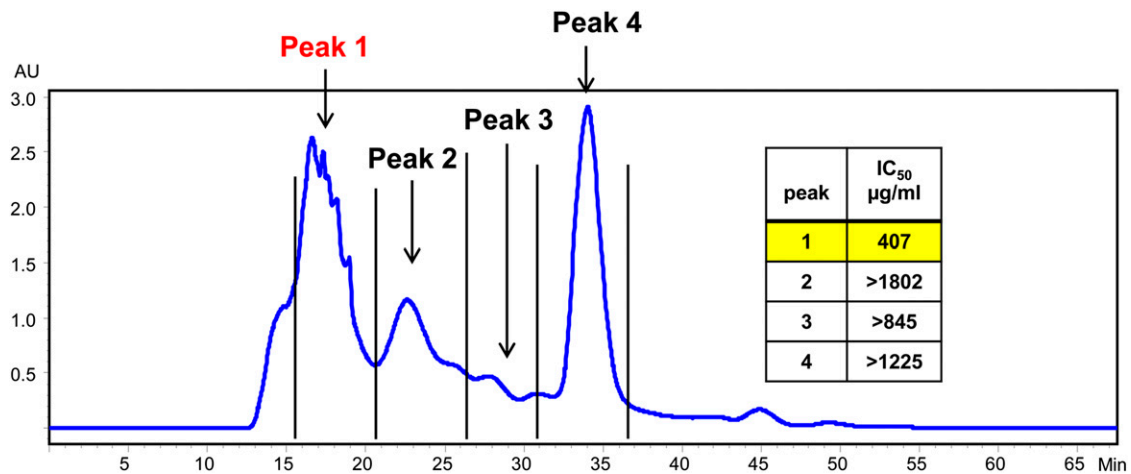

**Fig. S2.** Size-exclusion fractionation of breast milk reveals that HIV-1-neutralizing activity is solely contained in the high molecular mass fraction. Breast milk fractions (peaks 1–4) were tested for neutralization against the chronic clade C HIV-1 variant C.Du156 (tier 2 neutralization sensitivity) in the TZM-bl neutralization assay. Only the highest molecular mass fraction (peak 1, >500 kDa) had detectable neutralizing activity, with an inhibitory concentration 50% (IC<sub>50</sub>) of 407 µg/mL. The IC<sub>50</sub> of each size-fractionated protein peak is listed in the table.

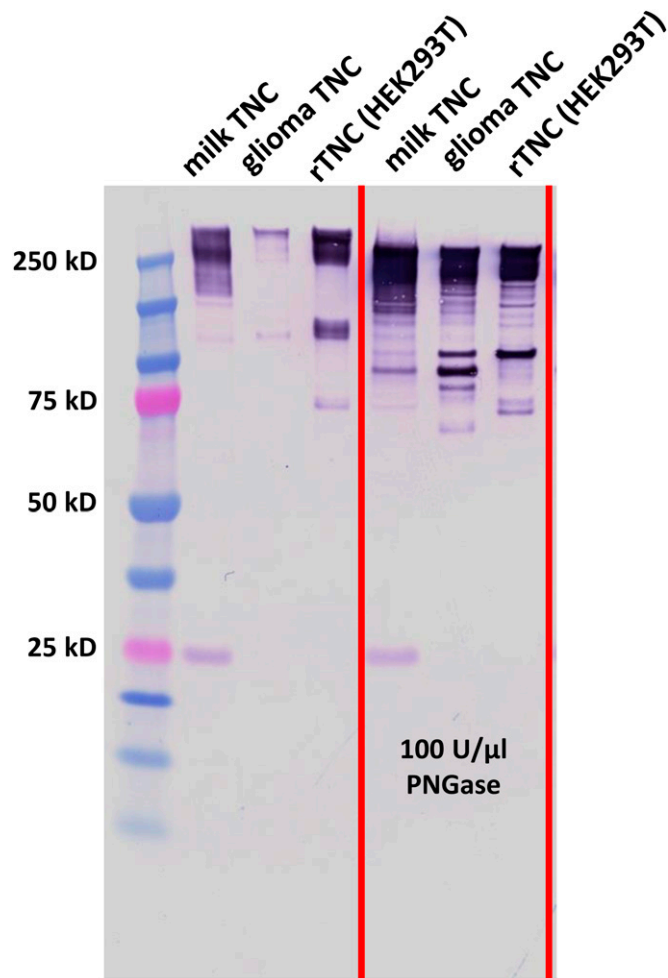

**Fig. S3.** Distinct N-linked glycosylation pattern of Tenascin-C (TNC) produced in different cell lines. TNC purified from breast milk, purified from a glioma cell line (Millipore), and recombinantly produced by HEK293T cells have distinct banding patterns on an anti-TNC Western blot after deglycosylation with 100 U/μl PNGase (Right).

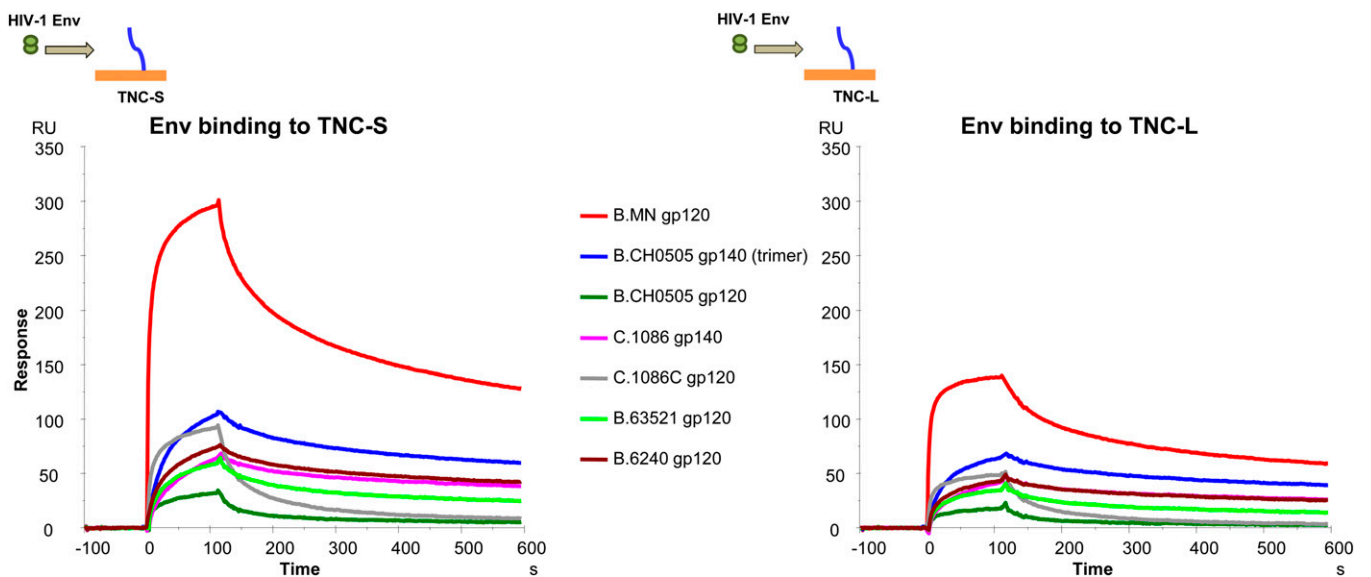

**Fig. S4.** Spliced short (TNC-S) and long (TNC-L) isoforms of TNC bind to HIV-1 Envelope (Env) gp120 and gp140 proteins. Recombinant TNC-L and TNC-S were covalently coupled to the surface plasmon resonance (SPR) chip, and HIV-1 Env gp120 and gp140 were flowed over the chip. TNC isoforms bound to both clade B and C and consensus Env gp120 and gp140 proteins, including the purified gp140 trimer of the transmitted/founder (T/F) virus CH0505. TNC-S and TNC-L bound with similar affinity to B.MN gp120 (54.8 and 58.2 nM, respectively).

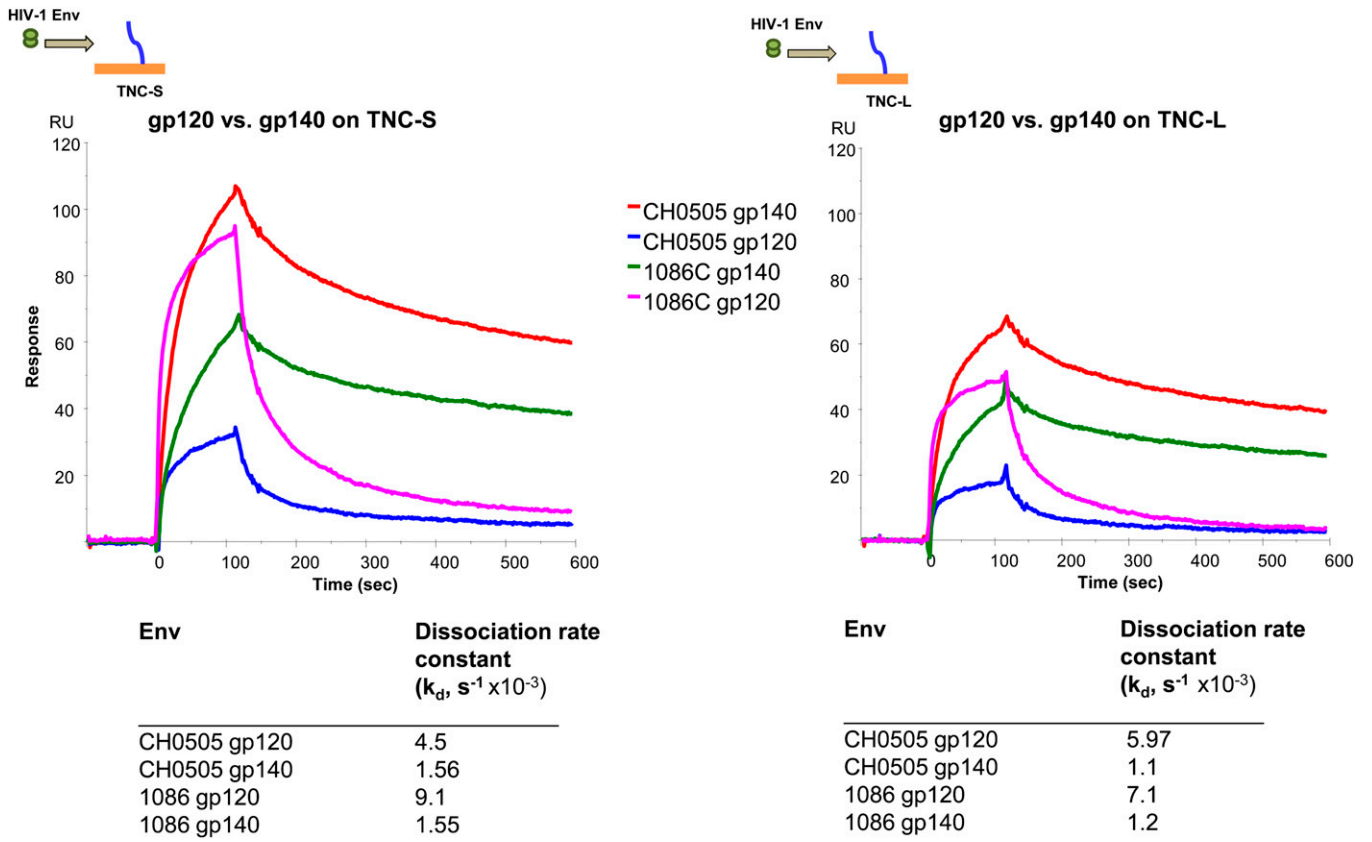

**Fig. S5.** Binding of TNC to Env gp140 has a slower off-rate than the binding of TNC to Env gp120. Recombinant TNC-L and TNC-S were covalently coupled to the SPR chip, and HIV-1 Env gp120 and gp140 were flowed over the chip. TNC isoforms bound to both gp120 and gp140 proteins of the T/F HIV-1 variants B. CH0505 and C.1086, but the binding to gp140 proteins had a slower off-rate.

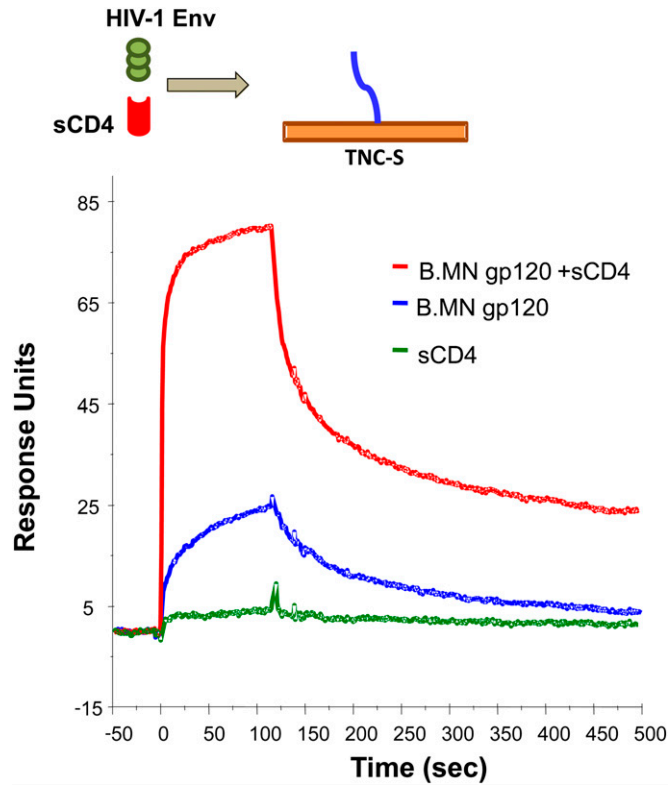

**Fig. 56.** CD4 binding to TNC does not account for the increased binding of soluble CD4-preincubated gp120 than gp120 alone to TNC. Recombinant TNC-S was covalently coupled to the SPR chip, and HIV-1 B.MN gp120 was flowed over the chip both before and after soluble CD4 preincubation. As a control, soluble CD4 alone was flowed over the TNC-S chip and no binding was detected.

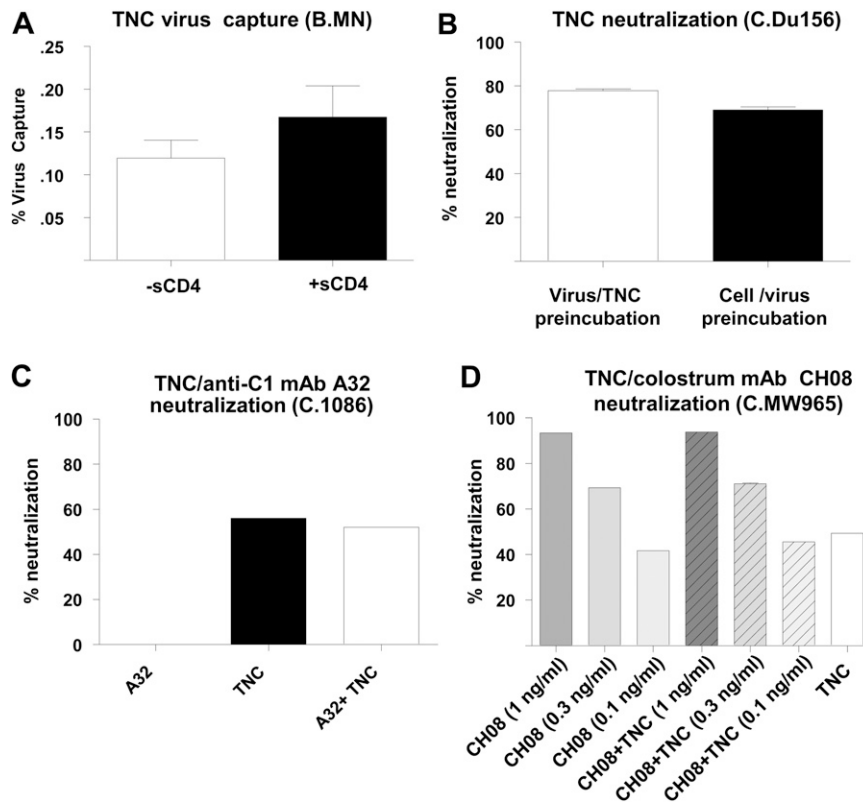

**Fig. 57.** Env CD4 triggering mildly increases TNC HIV-1 virion capture but not neutralization, and TNC does not antagonize the neutralizing activity of an anti-gp120 CD4-inducible mAb isolated from colostrum. (A) Preincubation of HIV-1 B.MN virions with soluble CD4 increases the efficiency of TNC virion capture by ~1.5-fold. (B) Preincubation of HIV-1 virions (B.Du156) with TZM-bl cells for 10 min on ice to allow virion-CD4 interaction before addition of TNC does not enhance the neutralizing potency of TNC. Graphs represent data from two assays performed in duplicate; lines indicate SD. (C) Preincubation of T/F HIV C.1086 virions with 100  $\mu$ g/mL anti-C1 Env mAb A32, which is known to induce a conformational change of the HIV-1 Env similar to that of CD4 binding, for 1 h before the addition of TNC (200  $\mu$ g/mL) and TZM-bl cells does not enhance TNC neutralization. (D) TNC does not antagonize the neutralizing potency of the CD4-inducible, colostrum mAb CH08 against HIV-1 C.MW965 at a range of concentrations performed in duplicate.
